# Supplementary material for: Actin filament alignment causes mechanical hysteresis in cross-linked networks
Source: Royal Society of Chemistry journal article supplement (doi:10.1039/d1sm00412c), 2021-01-01
Supplement: d1sm00412c1.pdf [file d1sm00412c1.pdf]

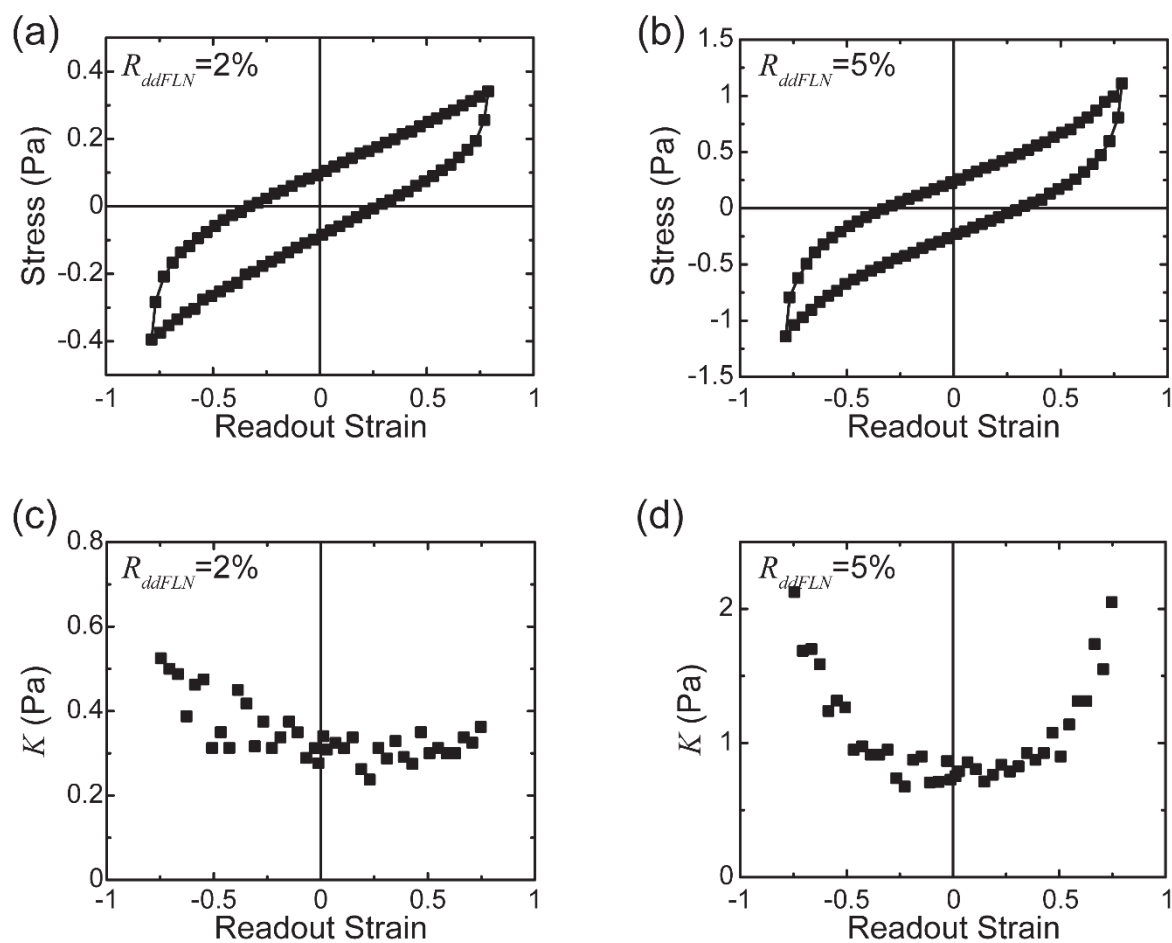

Figure S1: Strain stiffening in ddFLN networks. (a,b) Stress during readout for untrained ddFLN networks with (a)  $R_{ddFLN} = 2$  or (b)  $R_{ddFLN} = 5\%$ , concentrations at which the network has a linear or nonlinear response to strain, respectively. (c,d) The corresponding differential modulus  $K$  for networks with (c)  $R_{ddFLN} = 2\%$  or (d)  $R_{ddFLN} = 5\%$ .
